# Supplementary material for: Evaluation of a multiple and global analytical indicator of batch consistency: traditional Chinese medicine injection as a case study
Source: Royal Society of Chemistry journal article supplement (doi:10.1039/c9ra10065b), 2020-01-01
Supplement: c9ra10065b1.pdf [file c9ra10065b1.pdf]

# Electronic Supplementary Information

## 1 Validation for the macromolecule impurity detection method

### 1.1 validation for instrument precision

Table 1 The RSDs (%) of the instrument precision (peak area) for macromolecule impurity detection method

| Compounds | Peak area |         |         |         |         |         |             | SD        | RSD% |
|-----------|-----------|---------|---------|---------|---------|---------|-------------|-----------|------|
|           | 1         | 2       | 3       | 4       | 5       | 6       | average     |           |      |
| Rib A     | 626433    | 634316  | 641612  | 632069  | 646831  | 652750  | 639001.833  | 9850.053  | 1.54 |
| Ins       | 1268392   | 1265826 | 1257418 | 1250354 | 1262129 | 1250638 | 1259126.167 | 7637.777  | 0.61 |
| Thy       | 643692    | 641814  | 638811  | 627471  | 650589  | 629518  | 638649.167  | 8790.469  | 1.38 |
| Som       | 2184669   | 2180650 | 2182355 | 2178473 | 2214299 | 2184213 | 2187443.167 | 13355.645 | 0.61 |

Table 2 The RSDs (%) of the instrument precision (retention time) for macromolecule impurity detection method

| Compounds | Retention time |        |        |        |        |        |         | SD    | RSD% |
|-----------|----------------|--------|--------|--------|--------|--------|---------|-------|------|
|           | 1              | 2      | 3      | 4      | 5      | 6      | average |       |      |
| Rib A     | 14.761         | 14.759 | 14.76  | 14.758 | 14.757 | 14.754 | 14.758  | 0.002 | 0.02 |
| Ins       | 16.484         | 16.483 | 16.484 | 16.483 | 16.481 | 16.475 | 16.482  | 0.003 | 0.02 |
| Thy       | 17.623         | 17.621 | 17.622 | 17.621 | 17.619 | 17.612 | 17.620  | 0.004 | 0.02 |
| Som       | 18.846         | 18.843 | 18.844 | 18.843 | 18.84  | 18.834 | 18.842  | 0.004 | 0.02 |

## 1.2 validation for intra-day precision

Table 3 The RSDs (%) of the intra-day precision (peak area) for macromolecule impurity detection method

| Compounds | Peak area |          |          |          |          |          |             | SD        | RSD% |
|-----------|-----------|----------|----------|----------|----------|----------|-------------|-----------|------|
|           | sample 1  | sample 2 | sample 3 | sample 4 | sample 5 | sample 6 | average     |           |      |
| Rib A     | 592963    | 581754   | 563670   | 590844   | 580016   | 570257   | 579917.083  | 11404.086 | 1.97 |
| Ins       | 1139586   | 1123627  | 1107834  | 1158299  | 1128763  | 1140170  | 1133046.083 | 17169.265 | 1.52 |
| Thy       | 611452    | 612367   | 597658   | 616705   | 600637   | 604118   | 607156.083  | 7466.443  | 1.23 |
| Som       | 1297562   | 1295533  | 1304992  | 1232347  | 1136663  | 1221154  | 1248041.417 | 65307.703 | 5.23 |

## 1.3 validation for stability

Table 4 The RSDs (%) of the stability (peak area) for macromolecule impurity detection method

| Compounds | Peak area |         |         |         |         |         |         |         |         | RSD% |
|-----------|-----------|---------|---------|---------|---------|---------|---------|---------|---------|------|
|           | 0         | 2       | 4       | 6       | 8       | 10      | 12      | 24      | average |      |
| Rib A     | 609675    | 613703  | 634707  | 627933  | 610830  | 604690  | 605380  | 607265  | 614273  | 1.80 |
| Ins       | 1130888   | 1142663 | 1128343 | 1124823 | 1125387 | 1128458 | 1122131 | 1117717 | 1127551 | 0.65 |
| Thy       | 626385    | 628915  | 616301  | 637353  | 616908  | 632270  | 627036  | 631746  | 627114  | 1.17 |
| Som       | 1247151   | 1241927 | 1234656 | 1250992 | 1230013 | 1234184 | 1228862 | 1237707 | 1238187 | 0.64 |

## 1.4 validation for accuracy

Table 5 Accuracy for macromolecule impurity detection method

| Compounds | Peak area |        |        |        |        |        |                  | average      |
|-----------|-----------|--------|--------|--------|--------|--------|------------------|--------------|
|           | sample    | sample | sample | sample | sample | sample | area of standard | recovery (%) |

|       | 1       | 2       | 3       | 4       | 5       | 6       |         |       |
|-------|---------|---------|---------|---------|---------|---------|---------|-------|
| Rib A | 592963  | 581754  | 563670  | 590844  | 580016  | 570257  | 639383  | 90.70 |
| Ins   | 1139586 | 1123627 | 1107834 | 1158299 | 1128763 | 1140170 | 1168675 | 96.95 |
| Thy   | 611452  | 612367  | 597658  | 616705  | 600637  | 604118  | 632304  | 96.02 |

## 2 validation for phenol sulfuric acid assay

### 2.1 validation for instrument precision

Table 6 The RSDs (%) of the instrument precision (absorbance) for phenol sulfuric acid assay

| Samples | Absorbance (sample solution) | Absorbance (standard solution) |
|---------|------------------------------|--------------------------------|
| 1       | 0.6082                       | 0.5927                         |
| 2       | 0.6077                       | 0.5927                         |
| 3       | 0.6079                       | 0.5925                         |
| 4       | 0.6077                       | 0.5934                         |
| 5       | 0.6078                       | 0.5924                         |
| 6       | 0.6082                       | 0.5925                         |
| average | 0.6079                       | 0.5927                         |
| RSD (%) | 0.04                         | 0.06                           |

### 2.2 validation for intra-day precision

Table 7 The RSDs (%) of the intra-day precision (content) for phenol sulfuric acid assay

| Samples | Absorbance | Content (%) | Average (%) | RSD (%) |
|---------|------------|-------------|-------------|---------|
| 1       | 0.5864     | 0.3152      |             |         |
| 2       | 0.5799     | 0.3143      |             |         |
| 3       | 0.5935     | 0.3207      | 0.3170      | 1.55    |
| 4       | 0.5771     | 0.3107      |             |         |
| 5       | 0.6137     | 0.3246      |             |         |

|   |        |        |
|---|--------|--------|
| 6 | 0.5892 | 0.3168 |
|---|--------|--------|

## 2.3 validation for stability

Table 8 The RSDs (%) of the stability (absorbance) for phenol sulfuric acid assay

| Time (min) | 0      | 20    | 40     | 60     | 80     | 100    | 120    | 240    | 360    | Average RSD (%) |      |
|------------|--------|-------|--------|--------|--------|--------|--------|--------|--------|-----------------|------|
| absorbance | 0.6058 | 0.605 | 0.6038 | 0.6028 | 0.6018 | 0.6007 | 0.6000 | 0.5968 | 0.5943 | 0.6012          | 0.59 |

## 2.4 validation for accuracy

Table 9 Accuracy for phenol sulfuric acid assay

| Samples | m <sub>1</sub> (mg) | m <sub>2</sub> (mg) | m <sub>3</sub> (mg) | Recovery | Average recovery | RSD  |
|---------|---------------------|---------------------|---------------------|----------|------------------|------|
|         |                     |                     |                     | rate (%) | rate (%)         | (%)  |
| 1       | 0.03214             | 0.03105             | 0.06252             | 97.86    |                  |      |
| 2       | 0.03214             | 0.03105             | 0.06320             | 100.03   |                  |      |
| 3       | 0.03214             | 0.03105             | 0.06542             | 107.20   |                  |      |
| 4       | 0.03214             | 0.03105             | 0.06387             | 102.19   | 101.89           | 3.73 |
| 5       | 0.03214             | 0.03105             | 0.06490             | 105.52   |                  |      |
| 6       | 0.03214             | 0.03105             | 0.06274             | 98.55    |                  |      |

m<sub>1</sub>: the content contained in the sample. m<sub>2</sub>: the content added in the sample. m<sub>3</sub>: the content detected in the sample.

## 3 validation for HPLC-ELSD method

### 3.1 validation for instrument precision

Table 10 The RSDs (%) of the instrument precision (the logarithm of the peak area) for HPLC-ELSD method

| Samples | The logarithm of the peak area |        |        |        |
|---------|--------------------------------|--------|--------|--------|
|         | Fru                            | Glu    | Mel    | Man    |
| 1       | 8.0819                         | 6.9306 | 5.5049 | 6.2938 |
| 2       | 8.0819                         | 6.9306 | 5.5049 | 6.2938 |

|         |        |        |        |        |
|---------|--------|--------|--------|--------|
| 3       | 8.0912 | 6.9197 | 5.5385 | 6.3208 |
| 4       | 8.0717 | 6.9454 | 5.5936 | 6.3637 |
| 5       | 8.0766 | 6.9353 | 5.5428 | 6.3197 |
| 6       | 8.1004 | 6.9224 | 5.5722 | 6.3916 |
| average | 8.0840 | 6.9307 | 5.5428 | 6.3306 |
| RSD (%) | 0.13   | 0.13   | 0.64   | 0.62   |

Table 11 The RSDs (%) of the instrument precision (retention time) for HPLC-ELSD method

| Samples | Retention time |        |        |        |
|---------|----------------|--------|--------|--------|
|         | Fru            | Glu    | Mel    | Man    |
| 1       | 21.062         | 26.019 | 30.502 | 33.362 |
| 2       | 21.065         | 26.021 | 30.488 | 33.355 |
| 3       | 21.058         | 26.022 | 30.495 | 33.358 |
| 4       | 21.096         | 26.031 | 30.507 | 33.366 |
| 5       | 21.057         | 26.038 | 30.539 | 33.39  |
| 6       | 21.061         | 26.009 | 30.506 | 33.367 |
| average | 21.067         | 26.023 | 30.506 | 33.366 |
| RSD%    | 0.070          | 0.039  | 0.058  | 0.037  |

### 3.2 validation for intra-day precision

Table 12 The RSDs (%) of the intra-day precision (concentration %) for HPLC-ELSD method

| Samples | Concentration (%) |        |        |        |
|---------|-------------------|--------|--------|--------|
|         | Fru               | Glu    | Mel    | Man    |
| 1       | 0.1505            | 0.0464 | 0.0231 | 0.0849 |
| 2       | 0.1528            | 0.0475 | 0.0236 | 0.0872 |
| 3       | 0.1511            | 0.0478 | 0.0243 | 0.0878 |
| 4       | 0.1520            | 0.0476 | 0.0234 | 0.0875 |
| 5       | 0.1535            | 0.0474 | 0.0235 | 0.0866 |
| 6       | 0.1527            | 0.0476 | 0.0238 | 0.0893 |
| average | 0.1505            | 0.0464 | 0.0231 | 0.0849 |

|         |      |      |      |      |
|---------|------|------|------|------|
| RSD (%) | 0.75 | 1.03 | 1.79 | 1.66 |
|---------|------|------|------|------|

### 3.3 validation for inter-day precision

Table 13 The RSDs (%) of the inter-day precision (concentration %) for HPLC-ELSD method

| Time (day) | Concentration (%) |        |        |        |
|------------|-------------------|--------|--------|--------|
|            | Fru               | Glu    | Mel    | Man    |
| 1          | 0.1508            | 0.0473 | 0.0223 | 0.0783 |
| 2          | 0.1464            | 0.0458 | 0.0217 | 0.0763 |
| 3          | 0.1509            | 0.0477 | 0.0231 | 0.0802 |
| 4          | 0.1516            | 0.0480 | 0.0227 | 0.0796 |
| 5          | 0.1523            | 0.0473 | 0.0214 | 0.0760 |
| 6          | 0.1490            | 0.0473 | 0.0227 | 0.0776 |
| 7          | 0.1510            | 0.0487 | 0.0232 | 0.0796 |
| average    | 0.1503            | 0.0474 | 0.0225 | 0.0782 |
| RSD (%)    | 1.32              | 1.88   | 3.02   | 2.13   |

### 3.4 validation for stability

Table 14 The RSDs (%) of sample solution stability (the logarithm of the peak area) for HPLC-ELSD method

| Time (h) | Fru    | Glu    | Mel    | Man    |
|----------|--------|--------|--------|--------|
| 0        | 9.5419 | 7.0124 | 5.1596 | 6.4224 |
| 3        | 9.5482 | 7.0353 | 5.2062 | 6.4921 |
| 6        | 9.5650 | 7.0329 | 5.2100 | 6.4747 |
| 9        | 9.5587 | 7.0396 | 5.1756 | 6.4144 |
| 12       | 9.5821 | 7.0208 | 5.2528 | 6.4352 |
| 24       | 9.5834 | 7.1018 | 5.2370 | 6.3728 |
| average  | 9.5632 | 7.0409 | 5.2069 | 6.4353 |
| RSD (%)  | 0.18   | 0.45   | 0.68   | 0.67   |

Table 15 The RSDs (%) of standard solution stability (the logarithm of the peak area) for HPLC-ELSD method

| Time (h) | Fru    | Glu    | Mel    | Man    |
|----------|--------|--------|--------|--------|
| 0        | 8.5046 | 7.2617 | 5.9784 | 6.8144 |
| 3        | 8.4940 | 7.2986 | 5.9566 | 6.7969 |
| 6        | 8.5103 | 7.3288 | 6.0234 | 6.8766 |
| 9        | 8.5236 | 7.3035 | 5.9781 | 6.8218 |
| 12       | 8.5255 | 7.3333 | 6.0208 | 6.8217 |
| 24       | 8.5278 | 7.3766 | 6.0220 | 6.8709 |
| average  | 8.5143 | 7.3171 | 5.9966 | 6.8337 |
| RSD (%)  | 0.16   | 0.53   | 0.48   | 0.47   |

### 3.5 validation for accuracy

Table 16 Accuracy for HPLC-ELSD method

| Compounds | samples | C <sub>1</sub><br>(mg mL <sup>-1</sup> ) | C <sub>2</sub><br>(mg mL <sup>-1</sup> ) | C <sub>3</sub><br>(mg mL <sup>-1</sup> ) | Recovery rate<br>(%) | Average recovery<br>rate<br>(%) | RSD<br>% |
|-----------|---------|------------------------------------------|------------------------------------------|------------------------------------------|----------------------|---------------------------------|----------|
| Fru       | 1       | 0.3043                                   | 0.2898                                   | 0.5952                                   | 100.38               | 100.52                          | 0.97     |
|           | 2       | 0.3043                                   | 0.2898                                   | 0.5918                                   | 99.23                |                                 |          |
|           | 3       | 0.3043                                   | 0.2898                                   | 0.5972                                   | 101.09               |                                 |          |
|           | 4       | 0.3043                                   | 0.2898                                   | 0.5929                                   | 99.61                |                                 |          |
|           | 5       | 0.3043                                   | 0.2898                                   | 0.5993                                   | 101.8                |                                 |          |
|           | 6       | 0.3043                                   | 0.2898                                   | 0.5969                                   | 101                  |                                 |          |
| Glu       | 1       | 0.0948                                   | 0.0953                                   | 0.1855                                   | 95.16                | 99.88                           | 2.65     |
|           | 2       | 0.0948                                   | 0.0953                                   | 0.1917                                   | 101.71               |                                 |          |
|           | 3       | 0.0948                                   | 0.0953                                   | 0.1909                                   | 100.87               |                                 |          |
|           | 4       | 0.0948                                   | 0.0953                                   | 0.1906                                   | 100.57               |                                 |          |
|           | 5       | 0.0948                                   | 0.0953                                   | 0.1924                                   | 102.4                |                                 |          |
|           | 6       | 0.0948                                   | 0.0953                                   | 0.1888                                   | 98.59                |                                 |          |
| Mel       | 1       | 0.0473                                   | 0.0506                                   | 0.0969                                   | 98.11                | 97.97                           | 1.19     |
|           | 2       | 0.0473                                   | 0.0506                                   | 0.0963                                   | 96.85                |                                 |          |
|           | 3       | 0.0473                                   | 0.0506                                   | 0.0973                                   | 98.91                |                                 |          |
|           | 4       | 0.0473                                   | 0.0506                                   | 0.0977                                   | 99.57                |                                 |          |
|           | 5       | 0.0473                                   | 0.0506                                   | 0.0961                                   | 96.52                |                                 |          |

|     |   |        |        |        |        |        |      |
|-----|---|--------|--------|--------|--------|--------|------|
|     | 6 | 0.0473 | 0.0506 | 0.0968 | 97.85  |        |      |
| Man | 1 | 0.1745 | 0.1902 | 0.3696 | 102.56 |        |      |
|     | 2 | 0.1745 | 0.1902 | 0.3664 | 100.89 |        |      |
|     | 3 | 0.1745 | 0.1902 | 0.3662 | 100.77 |        |      |
|     | 4 | 0.1745 | 0.1902 | 0.3528 | 93.72  | 101.24 | 4.05 |
|     | 5 | 0.1745 | 0.1902 | 0.3726 | 104.16 |        |      |
|     | 6 | 0.1745 | 0.1902 | 0.3749 | 105.36 |        |      |

C<sub>1</sub>: the concentration contained in the sample. C<sub>2</sub>: the concentration added in the sample. C<sub>3</sub>: the concentration detected in the sample.

## 4 validation for HPLC-UV method

### 4.1 validation for HPLC-UV fingerprint methodology

#### 4.1.1 validation for the instrument precision

Table 17 The RSDs (%) of instrument precision (relative peak area) for HPLC-UV fingerprint methodology

| Peak number | Samples |         |         |         |         |         |         | RSD % |
|-------------|---------|---------|---------|---------|---------|---------|---------|-------|
|             | 1       | 2       | 3       | 4       | 5       | 6       | average |       |
| 1           | 0.0470  | 0.0475  | 0.0467  | 0.0471  | 0.0471  | 0.0475  |         | 0.65  |
| 2           | 0.3099  | 0.3105  | 0.3084  | 0.3080  | 0.3066  | 0.3055  | 0.3082  | 0.62  |
| 3           | 1.0000  | 1.0000  | 1.0000  | 1.0000  | 1.0000  | 1.0000  | 1.0000  | 0.00  |
| 4           | 61.4748 | 62.1657 | 61.7826 | 61.6987 | 61.7914 | 62.2334 | 61.8578 | 0.47  |
| 5           | 0.3049  | 0.3052  | 0.3037  | 0.3032  | 0.3019  | 0.3018  | 0.3034  | 0.47  |
| 6           | 0.0396  | 0.0399  | 0.0398  | 0.0399  | 0.0397  | 0.0396  | 0.0398  | 0.32  |
| 7           | 0.0529  | 0.0538  | 0.0540  | 0.0546  | 0.0548  | 0.0552  | 0.0542  | 1.56  |
| 8           | 0.0754  | 0.0749  | 0.0749  | 0.0746  | 0.0741  | 0.0735  | 0.0746  | 0.92  |
| 9           | 0.0197  | 0.0195  | 0.0194  | 0.0193  | 0.0195  | 0.0195  | 0.0195  | 0.78  |
| 10          | 0.0309  | 0.0307  | 0.0309  | 0.0310  | 0.0310  | 0.0309  | 0.0309  | 0.40  |
| 11          | 0.0244  | 0.0246  | 0.0246  | 0.0245  | 0.0247  | 0.0247  | 0.0246  | 0.43  |
| 12          | 0.0950  | 0.0949  | 0.0948  | 0.0952  | 0.0954  | 0.0958  | 0.0952  | 0.39  |
| 13          | 0.0355  | 0.0354  | 0.0358  | 0.0355  | 0.0352  | 0.0354  | 0.0355  | 0.54  |
| 14          | 0.0157  | 0.0163  | 0.0167  | 0.0163  | 0.0161  | 0.0159  | 0.0162  | 2.11  |
| 15          | 0.0146  | 0.0143  | 0.0144  | 0.0141  | 0.0144  | 0.0141  | 0.0143  | 1.32  |
| 16          | 0.1092  | 0.1098  | 0.1092  | 0.1099  | 0.1095  | 0.1097  | 0.1096  | 0.28  |
| 17          | 0.0243  | 0.0238  | 0.0241  | 0.0243  | 0.0245  | 0.0240  | 0.0242  | 1.00  |
| 18          | 0.5106  | 0.5124  | 0.5120  | 0.5120  | 0.5118  | 0.5129  | 0.5120  | 0.15  |



Table 18 The RSDs (%) of instrument precision (relative retention time) for HPLC-UV fingerprint methodology

| Peak number | Samples |        |         |         |         |         |         | RSD % |
|-------------|---------|--------|---------|---------|---------|---------|---------|-------|
|             | 1       | 2      | 3       | 4       | 5       | 6       | average |       |
| 1           | 0.7038  | 0.7015 | 0.7009  | 0.7004  | 0.7027  | 0.7022  | 0.7019  | 0.18  |
| 2           | 0.7585  | 0.7572 | 0.7559  | 0.7560  | 0.7565  | 0.7575  | 0.7569  | 0.13  |
| 3           | 1.0000  | 1.0000 | 1.0000  | 1.0000  | 1.0000  | 1.0000  | 1.0000  | 0.00  |
| 4           | 1.2111  | 1.2093 | 1.2104  | 1.2076  | 1.2099  | 1.2077  | 1.2093  | 0.12  |
| 5           | 1.6396  | 1.6373 | 1.6424  | 1.6383  | 1.6443  | 1.6367  | 1.6398  | 0.18  |
| 6           | 5.5082  | 5.4532 | 5.4991  | 5.4742  | 5.5065  | 5.4696  | 5.4851  | 0.41  |
| 7           | 5.5793  | 5.5232 | 5.5709  | 5.5457  | 5.5774  | 5.5404  | 5.5561  | 0.41  |
| 8           | 5.8702  | 5.8114 | 5.8615  | 5.8358  | 5.8670  | 5.8293  | 5.8459  | 0.41  |
| 9           | 6.3692  | 6.3084 | 6.3622  | 6.3343  | 6.3663  | 6.3230  | 6.3439  | 0.40  |
| 10          | 6.6126  | 6.5484 | 6.6047  | 6.5750  | 6.6091  | 6.5607  | 6.5851  | 0.42  |
| 11          | 6.7192  | 6.6502 | 6.7097  | 6.6774  | 6.7125  | 6.6622  | 6.6885  | 0.44  |
| 12          | 7.3741  | 7.2996 | 7.3630  | 7.3305  | 7.3691  | 7.3130  | 7.3416  | 0.43  |
| 13          | 7.5884  | 7.5095 | 7.5749  | 7.5422  | 7.5819  | 7.5229  | 7.5533  | 0.44  |
| 14          | 8.1243  | 8.0411 | 8.1107  | 8.0752  | 8.1193  | 8.0605  | 8.0885  | 0.43  |
| 15          | 8.5913  | 8.5046 | 8.5793  | 8.5409  | 8.5864  | 8.5268  | 8.5549  | 0.42  |
| 16          | 9.1333  | 9.0422 | 9.1185  | 9.0801  | 9.1245  | 9.0664  | 9.0942  | 0.40  |
| 17          | 9.3253  | 9.2334 | 9.3096  | 9.2714  | 9.3155  | 9.2565  | 9.2853  | 0.40  |
| 18          | 10.0885 | 9.9908 | 10.0721 | 10.0307 | 10.0749 | 10.0092 | 10.0444 | 0.40  |

#### 4.1.2 validation for repeatability

Table 19 The RSDs (%) of repeatability (relative peak area) for HPLC-UV fingerprint methodology

| Peak number | Samples |         |         |         |         |         |         | RSD % |
|-------------|---------|---------|---------|---------|---------|---------|---------|-------|
|             | 1       | 2       | 3       | 4       | 5       | 6       | average |       |
| 1           | 0.0474  | 0.0475  | 0.0478  | 0.0479  | 0.0480  | 0.0484  | 0.0478  | 0.77  |
| 2           | 0.3083  | 0.3101  | 0.3028  | 0.3170  | 0.3231  | 0.3375  | 0.3165  | 3.95  |
| 3           | 1.0000  | 1.0000  | 1.0000  | 1.0000  | 1.0000  | 1.0000  | 1.0000  | 0.00  |
| 4           | 62.3090 | 61.5763 | 62.8562 | 63.2322 | 63.0863 | 62.7217 | 62.6303 | 0.97  |
| 5           | 0.3025  | 0.3036  | 0.3018  | 0.3086  | 0.3132  | 0.3201  | 0.3083  | 2.35  |
| 6           | 0.0397  | 0.0395  | 0.0397  | 0.0400  | 0.0403  | 0.0399  | 0.0398  | 0.73  |
| 7           | 0.0556  | 0.0561  | 0.0537  | 0.0586  | 0.0590  | 0.0594  | 0.0571  | 3.99  |
| 8           | 0.0728  | 0.0726  | 0.0755  | 0.0707  | 0.0704  | 0.0701  | 0.0720  | 2.86  |
| 9           | 0.0192  | 0.0195  | 0.0195  | 0.0198  | 0.0195  | 0.0194  | 0.0195  | 1.08  |

|    |        |        |        |        |        |        |        |      |
|----|--------|--------|--------|--------|--------|--------|--------|------|
| 10 | 0.0309 | 0.0308 | 0.0308 | 0.0311 | 0.0311 | 0.0312 | 0.0310 | 0.50 |
| 11 | 0.0245 | 0.0247 | 0.0250 | 0.0247 | 0.0249 | 0.0247 | 0.0247 | 0.66 |
| 12 | 0.0963 | 0.0961 | 0.0950 | 0.0975 | 0.0957 | 0.0961 | 0.0961 | 0.87 |
| 13 | 0.0355 | 0.0360 | 0.0360 | 0.0359 | 0.0354 | 0.0354 | 0.0357 | 0.83 |
| 14 | 0.0151 | 0.0163 | 0.0165 | 0.0158 | 0.0165 | 0.0159 | 0.0160 | 3.29 |
| 15 | 0.0136 | 0.0142 | 0.0147 | 0.0139 | 0.0144 | 0.0144 | 0.0142 | 2.66 |
| 16 | 0.1093 | 0.1103 | 0.1098 | 0.1105 | 0.1107 | 0.1107 | 0.1102 | 0.50 |
| 17 | 0.0244 | 0.0243 | 0.0243 | 0.0235 | 0.0247 | 0.0245 | 0.0243 | 1.69 |
| 18 | 0.5124 | 0.5132 | 0.5112 | 0.5138 | 0.5156 | 0.5158 | 0.5137 | 0.35 |

Table 20 The RSDs (%) of repeatability (relative retention time) for HPLC-UV fingerprint methodology

| Peak number | Samples |         |        |        |        |        |         | RSD % |
|-------------|---------|---------|--------|--------|--------|--------|---------|-------|
|             | 1       | 2       | 3      | 4      | 5      | 6      | average |       |
| 1           | 0.7020  | 0.7008  | 0.7111 | 0.7045 | 0.7039 | 0.7039 | 0.7044  | 0.51  |
| 2           | 0.7580  | 0.7564  | 0.7663 | 0.7611 | 0.7602 | 0.7603 | 0.7604  | 0.45  |
| 3           | 1.0000  | 1.0000  | 1.0000 | 1.0000 | 1.0000 | 1.0000 | 1.0000  | 0.00  |
| 4           | 1.2077  | 1.2063  | 1.2071 | 1.2073 | 1.2072 | 1.2052 | 1.2068  | 0.07  |
| 5           | 1.6377  | 1.6393  | 1.6248 | 1.6325 | 1.6338 | 1.6338 | 1.6337  | 0.31  |
| 6           | 5.4761  | 5.4810  | 5.4108 | 5.4328 | 5.4462 | 5.4386 | 5.4476  | 0.49  |
| 7           | 5.5466  | 5.5506  | 5.4804 | 5.5028 | 5.5177 | 5.5099 | 5.5180  | 0.49  |
| 8           | 5.8344  | 5.8370  | 5.7666 | 5.7900 | 5.8067 | 5.7976 | 5.8054  | 0.46  |
| 9           | 6.3316  | 6.3307  | 6.2571 | 6.2841 | 6.3021 | 6.2909 | 6.2994  | 0.46  |
| 10          | 6.5716  | 6.5707  | 6.4943 | 6.5218 | 6.5409 | 6.5300 | 6.5382  | 0.46  |
| 11          | 6.6756  | 6.6713  | 6.5966 | 6.6247 | 6.6451 | 6.6330 | 6.6410  | 0.45  |
| 12          | 7.3273  | 7.3242  | 7.2415 | 7.2736 | 7.2918 | 7.2834 | 7.2903  | 0.44  |
| 13          | 7.5375  | 7.5318  | 7.4510 | 7.4851 | 7.5013 | 7.4926 | 7.4999  | 0.43  |
| 14          | 8.0712  | 8.0652  | 7.9804 | 8.0159 | 8.0347 | 8.0243 | 8.0319  | 0.42  |
| 15          | 8.5367  | 8.5305  | 8.4411 | 8.4763 | 8.4958 | 8.4841 | 8.4941  | 0.42  |
| 16          | 9.0725  | 9.0645  | 8.9763 | 9.0102 | 9.0322 | 9.0183 | 9.0290  | 0.40  |
| 17          | 9.2635  | 9.2519  | 9.1649 | 9.1980 | 9.2218 | 9.2069 | 9.2178  | 0.39  |
| 18          | 10.0192 | 10.0049 | 9.9121 | 9.9487 | 9.9746 | 9.9585 | 9.9697  | 0.39  |

### 4.1.3 validation for stability

Table 21 The RSDs (%) of stability (relative peak area) for HPLC-UV fingerprint methodology

| Peak number | Sample  |         |         |         |         |         | RSD %   |         |
|-------------|---------|---------|---------|---------|---------|---------|---------|---------|
|             | 0       | 3.0     | 6.0     | 12.0    | 18.0    | 24.0    |         | average |
| 1           | 0.0488  | 0.0485  | 0.0485  | 0.0491  | 0.0487  | 0.0491  | 0.0488  | 0.63    |
| 2           | 0.3289  | 0.3285  | 0.3295  | 0.3251  | 0.3298  | 0.3371  | 0.3298  | 1.19    |
| 3           | 1.0000  | 1.0000  | 1.0000  | 1.0000  | 1.0000  | 1.0000  | 1.0000  | 0.00    |
| 4           | 62.9221 | 62.3882 | 62.3987 | 63.3738 | 62.9963 | 63.4018 | 62.9135 | 0.71    |

|    |        |        |        |        |        |        |        |      |
|----|--------|--------|--------|--------|--------|--------|--------|------|
| 5  | 0.3135 | 0.3114 | 0.3111 | 0.3111 | 0.3125 | 0.3169 | 0.3127 | 0.72 |
| 6  | 0.0400 | 0.0396 | 0.0396 | 0.0397 | 0.0396 | 0.0397 | 0.0397 | 0.45 |
| 7  | 0.0534 | 0.0542 | 0.0552 | 0.0569 | 0.0579 | 0.0597 | 0.0562 | 4.24 |
| 8  | 0.0758 | 0.0743 | 0.0737 | 0.0719 | 0.0704 | 0.0700 | 0.0727 | 3.18 |
| 9  | 0.0194 | 0.0196 | 0.0196 | 0.0193 | 0.0192 | 0.0197 | 0.0195 | 1.05 |
| 10 | 0.0313 | 0.0305 | 0.0309 | 0.0309 | 0.0311 | 0.0315 | 0.0310 | 1.12 |
| 11 | 0.0250 | 0.0247 | 0.0245 | 0.0248 | 0.0241 | 0.0242 | 0.0245 | 1.43 |
| 12 | 0.0954 | 0.0963 | 0.0948 | 0.0954 | 0.0943 | 0.0946 | 0.0951 | 0.76 |
| 13 | 0.0353 | 0.0349 | 0.0351 | 0.0350 | 0.0348 | 0.0351 | 0.0350 | 0.48 |
| 14 | 0.0159 | 0.0154 | 0.0153 | 0.0155 | 0.0152 | 0.0147 | 0.0153 | 2.50 |
| 15 | 0.0150 | 0.0143 | 0.0144 | 0.0144 | 0.0145 | 0.0149 | 0.0146 | 2.18 |
| 16 | 0.1098 | 0.1093 | 0.1096 | 0.1098 | 0.1094 | 0.1095 | 0.1096 | 0.17 |
| 17 | 0.0242 | 0.0241 | 0.0243 | 0.0242 | 0.0242 | 0.0237 | 0.0241 | 0.86 |
| 18 | 0.5120 | 0.5088 | 0.5079 | 0.5104 | 0.5104 | 0.5131 | 0.5104 | 0.38 |

Table 22 The RSDs (%) of stability (relative retention time) for HPLC-UV fingerprint methodology

| Peak number | Testing time(h) |         |         |        |        |        |         | RSD % |
|-------------|-----------------|---------|---------|--------|--------|--------|---------|-------|
|             | 0               | 3.0     | 6.0     | 12.0   | 18.0   | 24.0   | average |       |
| 1           | 0.7029          | 0.7029  | 0.7029  | 0.7092 | 0.7032 | 0.7020 | 0.7039  | 0.38  |
| 2           | 0.7591          | 0.7589  | 0.7592  | 0.7645 | 0.7598 | 0.7591 | 0.7601  | 0.29  |
| 3           | 1.0000          | 1.0000  | 1.0000  | 1.0000 | 1.0000 | 1.0000 | 1.0000  | 0.00  |
| 4           | 1.2052          | 1.2066  | 1.2067  | 1.2077 | 1.2063 | 1.2067 | 1.2065  | 0.07  |
| 5           | 1.6357          | 1.6378  | 1.6363  | 1.6251 | 1.6317 | 1.6335 | 1.6334  | 0.28  |
| 6           | 5.4640          | 5.4801  | 5.4708  | 5.4011 | 5.4207 | 5.4406 | 5.4462  | 0.57  |
| 7           | 5.5345          | 5.5507  | 5.5412  | 5.4708 | 5.4910 | 5.5108 | 5.5165  | 0.57  |
| 8           | 5.8242          | 5.8405  | 5.8302  | 5.7570 | 5.7788 | 5.7996 | 5.8051  | 0.56  |
| 9           | 6.3206          | 6.3363  | 6.3282  | 6.2485 | 6.2712 | 6.2932 | 6.2997  | 0.55  |
| 10          | 6.5586          | 6.5755  | 6.5682  | 6.4857 | 6.5086 | 6.5313 | 6.5380  | 0.55  |
| 11          | 6.6626          | 6.6788  | 6.6730  | 6.5884 | 6.6118 | 6.6335 | 6.6413  | 0.55  |
| 12          | 7.3130          | 7.3312  | 7.3270  | 7.2311 | 7.2583 | 7.2831 | 7.2906  | 0.55  |
| 13          | 7.5228          | 7.5418  | 7.5409  | 7.4377 | 7.4672 | 7.4917 | 7.5004  | 0.56  |
| 14          | 8.0582          | 8.0744  | 8.0774  | 7.9646 | 7.9981 | 8.0240 | 8.0328  | 0.56  |
| 15          | 8.5202          | 8.5374  | 8.5423  | 8.4250 | 8.4583 | 8.4851 | 8.4947  | 0.55  |
| 16          | 9.0569          | 9.0773  | 9.0801  | 8.9580 | 8.9923 | 9.0200 | 9.0308  | 0.55  |
| 17          | 9.2458          | 9.2671  | 9.2709  | 9.1470 | 9.1819 | 9.2081 | 9.2201  | 0.54  |
| 18          | 9.9986          | 10.0275 | 10.0293 | 9.8928 | 9.9337 | 9.9585 | 9.9734  | 0.55  |

## 4.2 validation for HPLC-UV quantitative analysis method

### 4.2.1 validation for instrument precision

Table 23 The RSDs (%) of the instrument precision (peak area) for HPLC-UV method

| Samples | Peak area |        |       |       |        |
|---------|-----------|--------|-------|-------|--------|
|         | DSS       | PA     | RA    | SAB   | SAA    |
| 1       | 597.90    | 183.40 | 56.80 | 65.30 | 305.30 |
| 2       | 596.40    | 183.00 | 56.60 | 65.50 | 305.60 |
| 3       | 597.90    | 181.60 | 56.70 | 65.30 | 306.10 |
| 4       | 596.70    | 180.90 | 56.80 | 65.60 | 305.50 |
| 5       | 596.20    | 180.00 | 56.90 | 65.30 | 305.20 |
| 6       | 596.00    | 180.90 | 57.10 | 65.40 | 305.70 |
| average | 596.85    | 181.63 | 56.82 | 65.40 | 305.57 |
| RSD (%) | 0.14      | 0.73   | 0.30  | 0.19  | 0.10   |

Table 24 The RSDs (%) of the instrument precision (retention time) for HPLC-UV method

| Samples | Retention time |        |        |        |        |
|---------|----------------|--------|--------|--------|--------|
|         | DSS            | PA     | RA     | SAB    | SAA    |
| 1       | 6.249          | 10.246 | 46.081 | 57.074 | 63.043 |
| 2       | 6.298          | 10.312 | 45.973 | 56.948 | 62.922 |
| 3       | 6.259          | 10.280 | 46.085 | 57.073 | 63.041 |
| 4       | 6.278          | 10.285 | 46.021 | 57.005 | 62.973 |
| 5       | 6.247          | 10.272 | 46.035 | 57.001 | 62.938 |
| 6       | 6.297          | 10.306 | 46.050 | 57.091 | 63.028 |
| average | 6.271          | 10.284 | 46.041 | 57.032 | 62.991 |
| RSD (%) | 0.37           | 0.23   | 0.09   | 0.10   | 0.09   |

## 4.2.2 validation for intra-day precision

Table 25 The RSDs (%) of the intra-day precision (concentration) for HPLC-UV method

| Samples | Concentration (mg g <sup>-1</sup> ) |        |        |        |        |
|---------|-------------------------------------|--------|--------|--------|--------|
|         | DSS                                 | PA     | RA     | SAB    | SAA    |
| 1       | 0.4116                              | 0.0191 | 0.0150 | 0.0297 | 0.0553 |
| 2       | 0.4121                              | 0.0192 | 0.0150 | 0.0301 | 0.0554 |
| 3       | 0.4135                              | 0.0192 | 0.0149 | 0.0300 | 0.0554 |
| 4       | 0.4104                              | 0.0194 | 0.0152 | 0.0300 | 0.0553 |
| 5       | 0.4111                              | 0.0198 | 0.0149 | 0.0301 | 0.0556 |
| 6       | 0.4125                              | 0.0203 | 0.0150 | 0.0302 | 0.0558 |
| average | 0.4119                              | 0.0195 | 0.0150 | 0.0300 | 0.0555 |
| RSD (%) | 0.27                                | 2.35   | 0.69   | 0.51   | 0.34   |

## 4.2.3 validation for inter-day precision

Table 26 The RSDs (%) of the inter-day precision (concentration mg mL<sup>-1</sup>) for HPLC-UV method

| Time (day) | Concentration (mg mL <sup>-1</sup> ) |        |        |        |        |
|------------|--------------------------------------|--------|--------|--------|--------|
|            | DSS                                  | PA     | RA     | SAB    | SAA    |
| 1          | 0.4198                               | 0.0199 | 0.0149 | 0.0308 | 0.0573 |
| 2          | 0.4108                               | 0.0196 | 0.0148 | 0.0302 | 0.0559 |
| 3          | 0.4079                               | 0.0171 | 0.0147 | 0.0300 | 0.0568 |
| 4          | 0.4020                               | 0.0190 | 0.0146 | 0.0296 | 0.0581 |
| 5          | 0.4033                               | 0.0195 | 0.0148 | 0.0307 | 0.0607 |
| 6          | 0.4058                               | 0.0191 | 0.0150 | 0.0308 | 0.0635 |
| average    | 0.4083                               | 0.0190 | 0.0148 | 0.0303 | 0.0587 |
| RSD (%)    | 1.59                                 | 5.33   | 0.80   | 1.62   | 4.88   |

#### 4.2.4 validation for stability

Table 27 The RSDs (%) of the stability (concentration mg g<sup>-1</sup>) for HPLC-UV method

| Time (h) | Concentration (mg g <sup>-1</sup> ) |        |        |        |        |
|----------|-------------------------------------|--------|--------|--------|--------|
|          | DSS                                 | PA     | RA     | SAB    | SAA    |
| 0        | 0.2263                              | 0.0109 | 0.0082 | 0.0164 | 0.0304 |
| 3        | 0.2279                              | 0.0109 | 0.0083 | 0.0165 | 0.0304 |
| 6        | 0.2278                              | 0.0109 | 0.0082 | 0.0165 | 0.0303 |
| 12       | 0.2263                              | 0.0108 | 0.0082 | 0.0164 | 0.0303 |
| 18       | 0.2270                              | 0.0109 | 0.0081 | 0.0164 | 0.0304 |
| 24       | 0.2256                              | 0.0110 | 0.0081 | 0.0163 | 0.0303 |
| average  | 0.2268                              | 0.0109 | 0.0082 | 0.0164 | 0.0304 |
| RSD (%)  | 0.41                                | 0.54   | 1.00   | 0.38   | 0.14   |

#### 4.2.5 validation for accuracy

Table 28 Accuracy for HPLC-ELSD method

| Compounds | Samples | m <sub>1</sub><br>(mg) | m <sub>2</sub><br>(mg) | m <sub>3</sub><br>(mg) | Recovery rate<br>(%) | Average recovery rate<br>(%) | RSD<br>% |
|-----------|---------|------------------------|------------------------|------------------------|----------------------|------------------------------|----------|
| DSS       | 1       | 1.0781                 | 0.6299                 | 1.6819                 | 95.87                | 98.01                        | 1.59     |
|           | 2       | 1.0775                 | 0.6299                 | 1.6902                 | 97.26                |                              |          |
|           | 3       | 1.0776                 | 0.6299                 | 1.6812                 | 95.82                |                              |          |
|           | 4       | 1.0773                 | 1.0499                 | 2.1169                 | 99.02                |                              |          |
|           | 5       | 1.0764                 | 1.0499                 | 2.1027                 | 97.75                |                              |          |
|           | 6       | 1.0768                 | 1.0499                 | 2.1083                 | 98.25                |                              |          |
|           | 7       | 1.0767                 | 1.4698                 | 2.5346                 | 99.19                |                              |          |
|           | 8       | 1.0787                 | 1.4698                 | 2.5492                 | 100.04               |                              |          |
|           | 9       | 1.0772                 | 1.4698                 | 2.5312                 | 98.93                |                              |          |
| PA        | 1       | 0.0530                 | 0.0451                 | 0.0982                 | 100.23               | 95.10                        | 4.18     |
|           | 2       | 0.0530                 | 0.0451                 | 0.0982                 | 100.15               |                              |          |
|           | 3       | 0.0530                 | 0.0451                 | 0.0979                 | 99.48                |                              |          |
|           | 4       | 0.0530                 | 0.0751                 | 0.1247                 | 95.38                |                              |          |
|           | 5       | 0.0530                 | 0.0751                 | 0.1238                 | 94.23                |                              |          |
|           | 6       | 0.0530                 | 0.0751                 | 0.1233                 | 93.65                |                              |          |
|           | 7       | 0.0530                 | 0.1052                 | 0.1482                 | 90.54                |                              |          |
|           | 8       | 0.0531                 | 0.1052                 | 0.1493                 | 91.53                |                              |          |

|     |   |        |        |        |        |        |      |
|-----|---|--------|--------|--------|--------|--------|------|
|     | 9 | 0.0530 | 0.1052 | 0.1484 | 90.74  |        |      |
| RA  | 1 | 0.0402 | 0.0355 | 0.0754 | 99.24  |        |      |
|     | 2 | 0.0402 | 0.0355 | 0.0754 | 99.30  |        |      |
|     | 3 | 0.0402 | 0.0355 | 0.0751 | 98.44  |        |      |
|     | 4 | 0.0402 | 0.0591 | 0.0990 | 99.45  |        |      |
|     | 5 | 0.0401 | 0.0591 | 0.0985 | 98.74  | 99.50  | 0.91 |
|     | 6 | 0.0401 | 0.0591 | 0.0985 | 98.72  |        |      |
|     | 7 | 0.0401 | 0.0828 | 0.1233 | 100.44 |        |      |
|     | 8 | 0.0402 | 0.0828 | 0.1240 | 101.27 |        |      |
|     | 9 | 0.0401 | 0.0828 | 0.1228 | 99.87  |        |      |
| SAB | 1 | 0.0807 | 0.1366 | 0.2129 | 96.76  |        |      |
|     | 2 | 0.0807 | 0.1366 | 0.2147 | 98.13  |        |      |
|     | 3 | 0.0807 | 0.1366 | 0.2142 | 97.74  |        |      |
|     | 4 | 0.0807 | 0.2276 | 0.3086 | 100.11 |        |      |
|     | 5 | 0.0806 | 0.2276 | 0.3057 | 98.88  | 98.74  | 1.21 |
|     | 6 | 0.0806 | 0.2276 | 0.3060 | 98.99  |        |      |
|     | 7 | 0.0806 | 0.3187 | 0.3988 | 99.83  |        |      |
|     | 8 | 0.0808 | 0.3187 | 0.4004 | 100.27 |        |      |
|     | 9 | 0.0807 | 0.3187 | 0.3928 | 97.94  |        |      |
| SAA | 1 | 0.1547 | 0.1204 | 0.2791 | 103.36 |        |      |
|     | 2 | 0.1546 | 0.1204 | 0.2802 | 104.34 |        |      |
|     | 3 | 0.1546 | 0.1204 | 0.2790 | 103.33 |        |      |
|     | 4 | 0.1546 | 0.2006 | 0.3660 | 105.40 |        |      |
|     | 5 | 0.1544 | 0.2006 | 0.3642 | 104.56 | 104.49 | 0.92 |
|     | 6 | 0.1545 | 0.2006 | 0.3646 | 104.73 |        |      |
|     | 7 | 0.1545 | 0.2809 | 0.4501 | 105.26 |        |      |
|     | 8 | 0.1548 | 0.2809 | 0.4524 | 105.95 |        |      |
|     | 9 | 0.1545 | 0.2809 | 0.4451 | 103.43 |        |      |

$m_1$ : the content contained in the sample.  $m_2$ : the content added in the sample.  $m_3$ : the content detected in the sample.

## 5 Linearity for different methods

Table 29 The linearity for different methods

| Method                         | Compounds     | Regression equation | R <sup>2</sup> | Linearity range<br>( $\mu\text{g mL}^{-1}$ ) |
|--------------------------------|---------------|---------------------|----------------|----------------------------------------------|
| HPLC                           | macromolecule | $Y=-0.2265X+7.4854$ | 0.9996         | Mw:1638~13700                                |
| The phenol sulfuric acid assay | Glu           | $Y=9.3201X-0.0061$  | 0.9995         | 20.7~93.2                                    |
|                                | Fru           | $Y=1.4544X+0.2334$  | 0.9993         | 81.2~677                                     |
| HPLC-ELSD                      | Glu           | $Y=1.4493 X-0.4727$ | 0.9998         | 66.5~554                                     |
|                                | Mel           | $Y=1.5211 X-1.7741$ | 0.9994         | 50.6~422                                     |
|                                | Man           | $Y=1.5224X-2.3766$  | 0.9998         | 121~1010                                     |

|      |      |                     |        |           |
|------|------|---------------------|--------|-----------|
| HPLC | DSS  | $Y=2606.0X+2.3184$  | 0.9999 | 7.42~473  |
|      | PA   | $Y=16845.2X+2.1490$ | 0.9999 | 1.16~73.9 |
|      | RA   | $Y=6758.1X+1.2019$  | 0.9999 | 1.18~75.1 |
|      | SA B | $Y=3881.4X+1.2153$  | 0.9999 | 2.31~148  |
|      | SA A | $Y=10057.0X-2.4057$ | 0.9997 | 2.02~129  |

## 6 Determination of indicators

### 6.1 Macromolecular impurity inspection

13 batches of injections were tested, which were shown as followed. And no macromolecular impurity was detected. Each sample was measured in parallel twice.

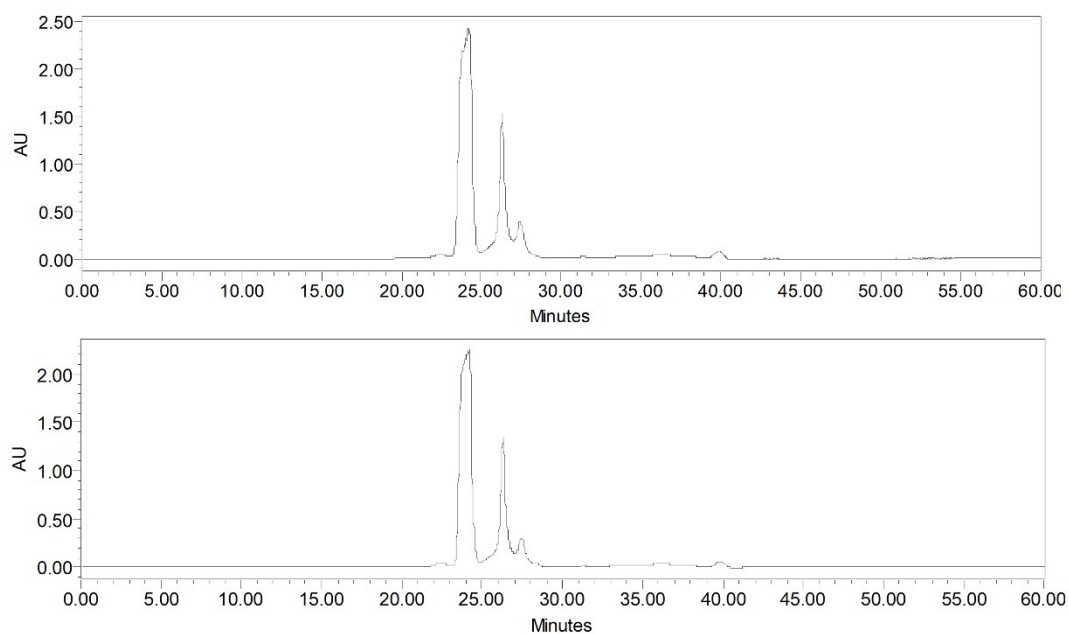

Fig. 1 HPLC-UV chromatograms of batch 1



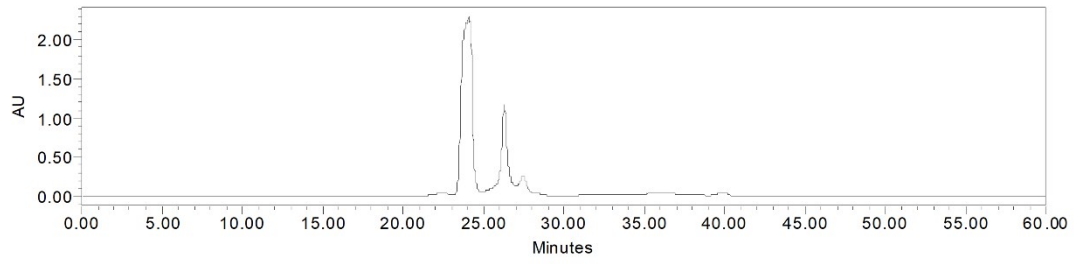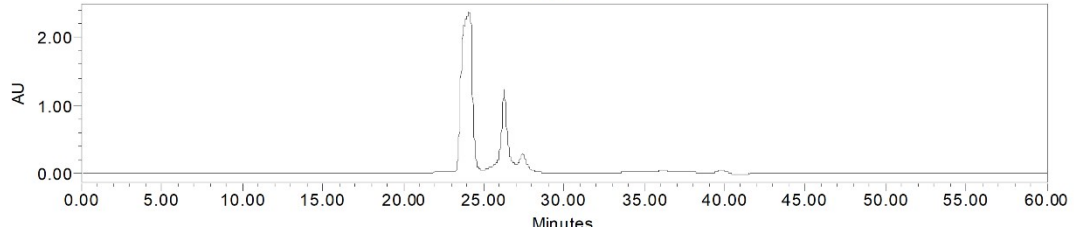

Fig. 2 HPLC-UV chromatograms of batch 2

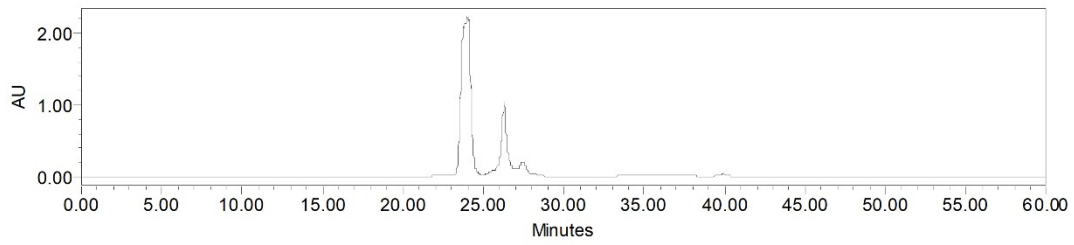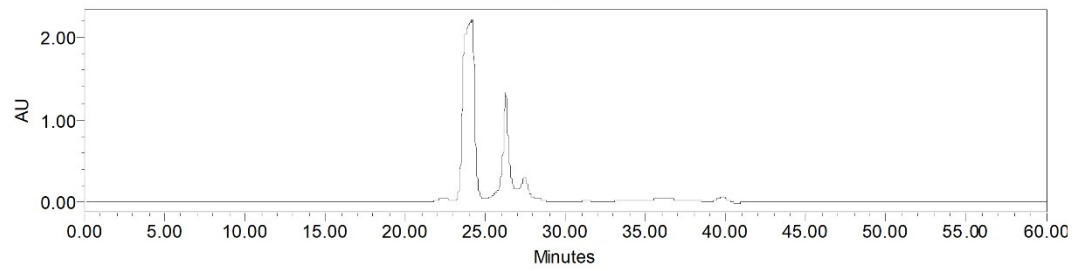

Fig. 3 HPLC-UV chromatograms of batch 3

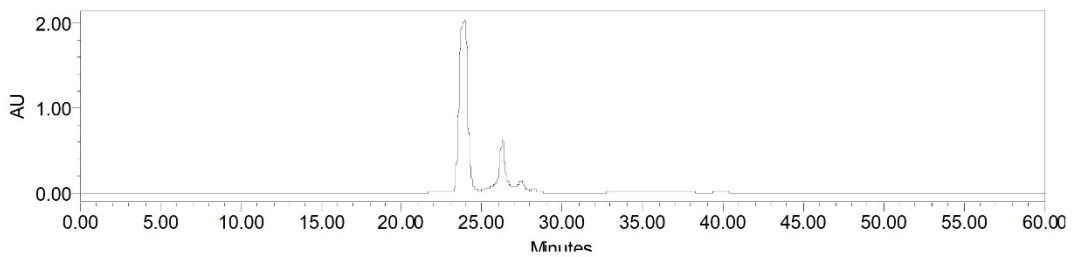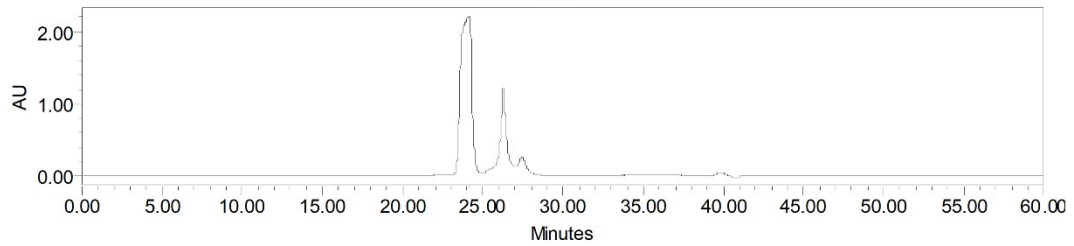

Fig. 4 HPLC-UV chromatograms of batch 4

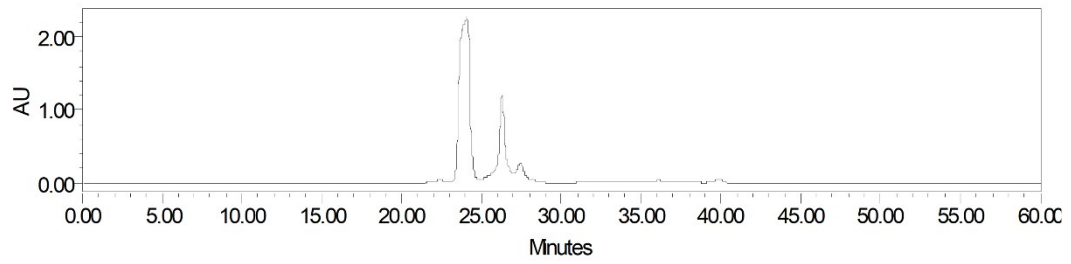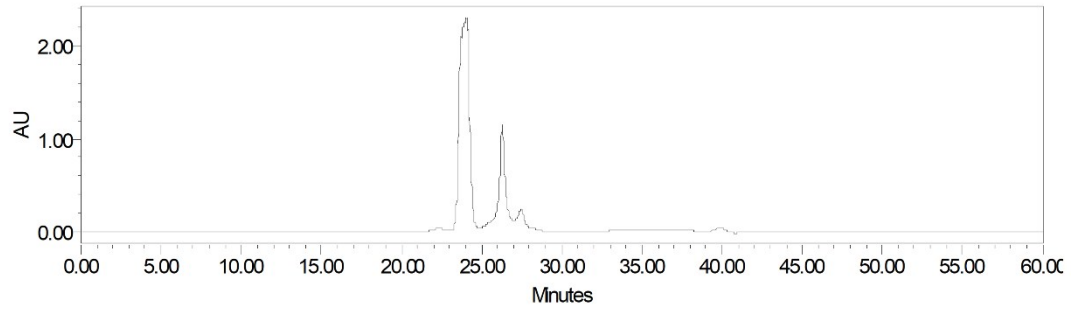

Fig. 5 HPLC-UV chromatograms of batch 5

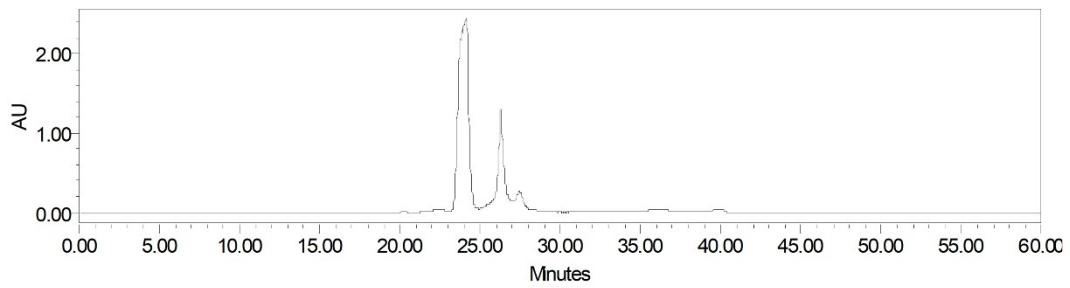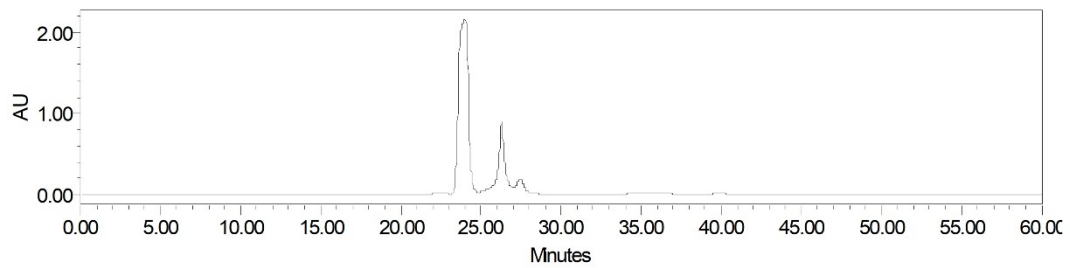

Fig. 6 HPLC-UV chromatograms of batch 6

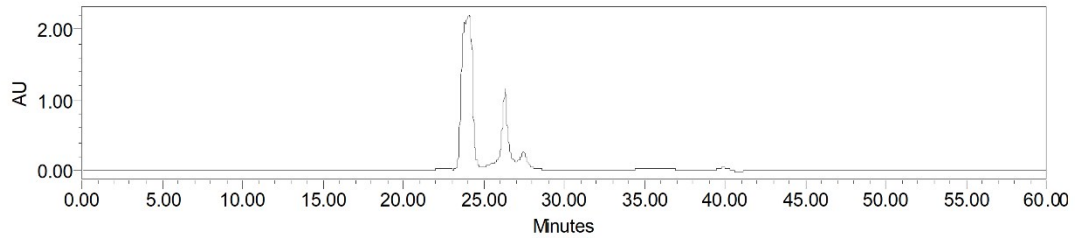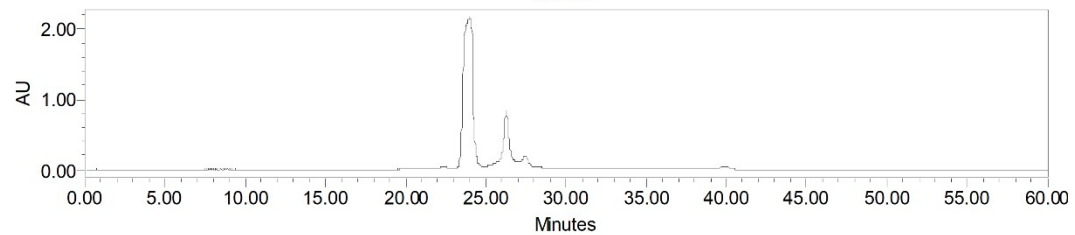

Fig. 7 HPLC-UV chromatograms of batch 7

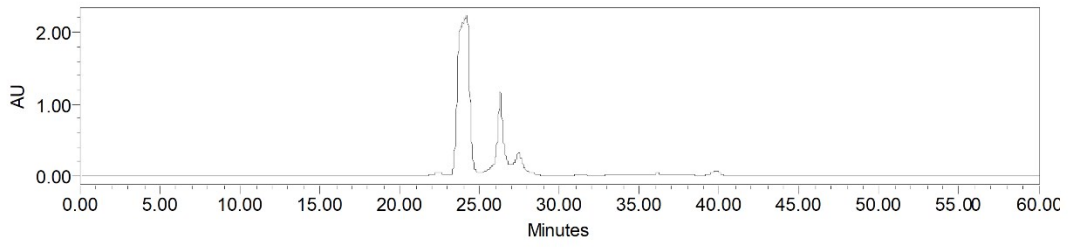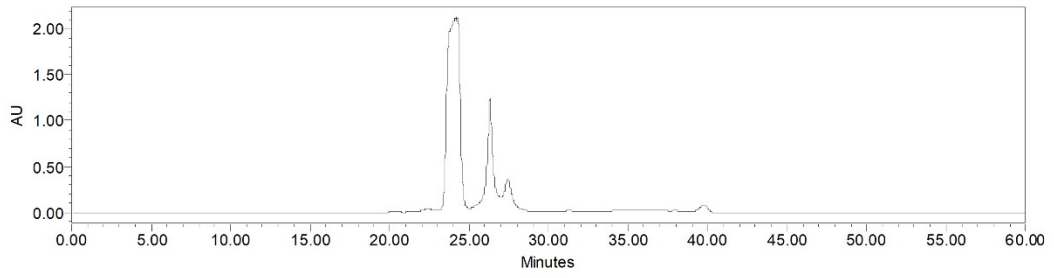

Fig. 8 HPLC-UV chromatograms of batch 8

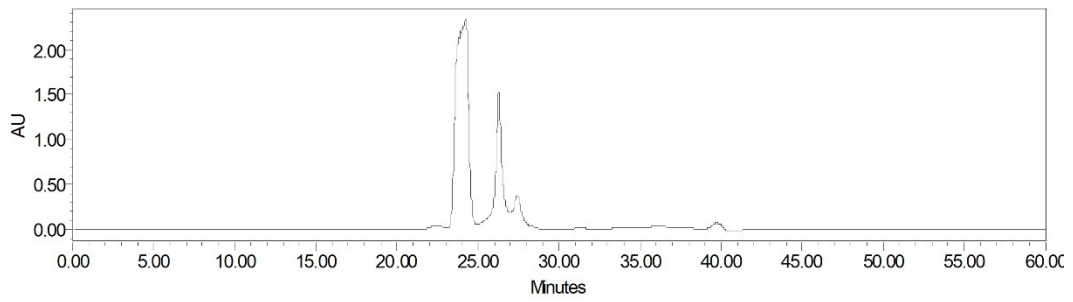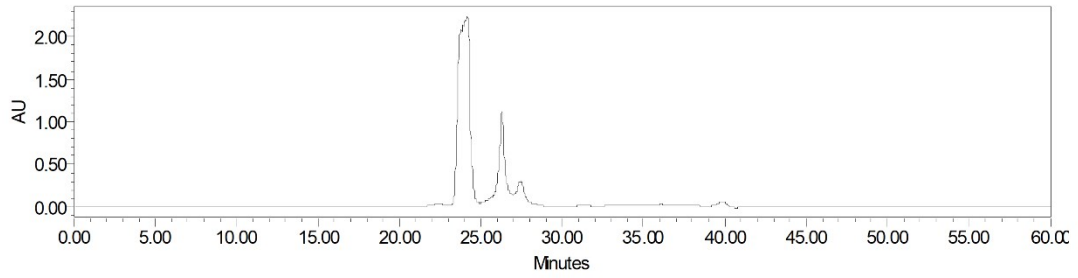

Fig. 9 HPLC-UV chromatograms of batch 9

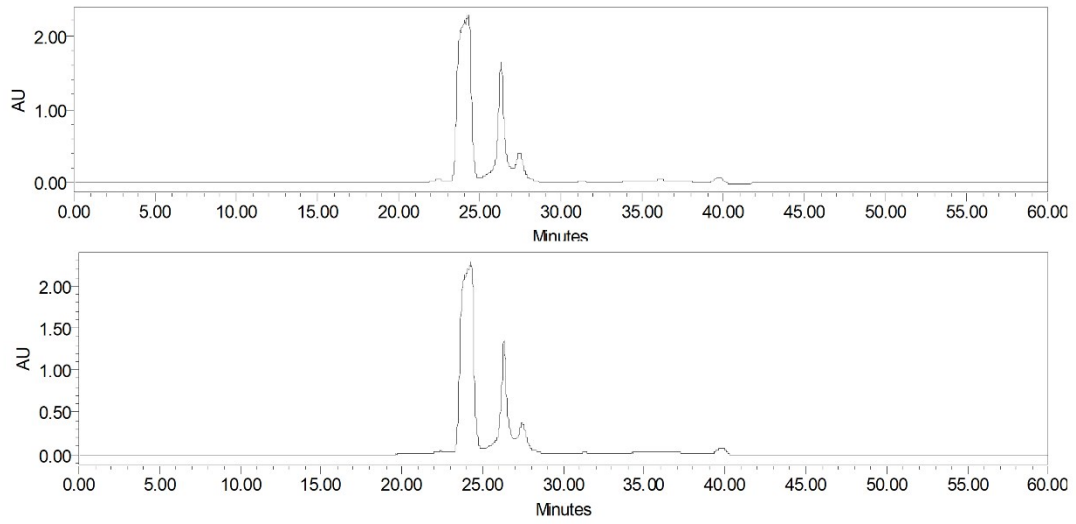

Fig. 10 HPLC-UV chromatograms of batch 10

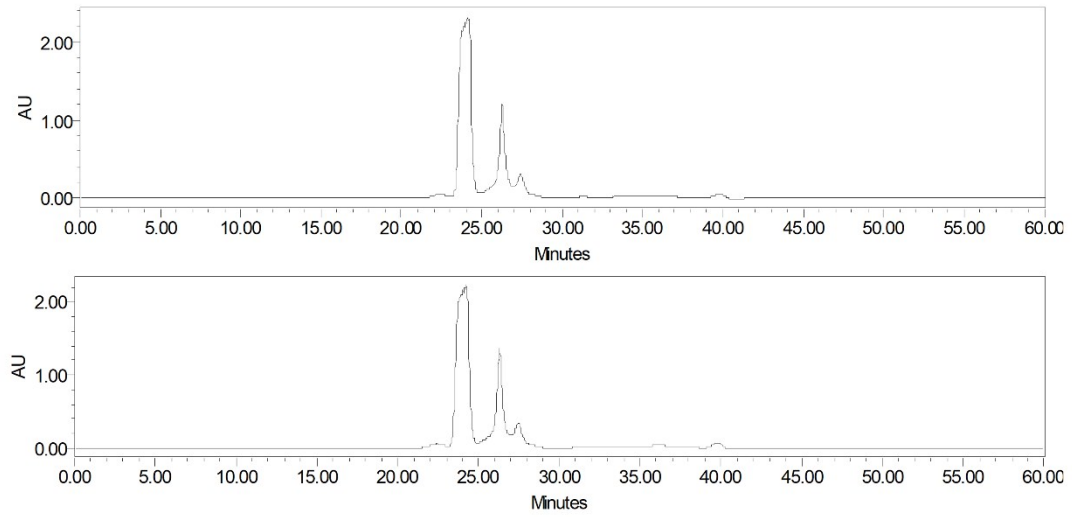

Fig. 11 HPLC-UV chromatograms of batch 11

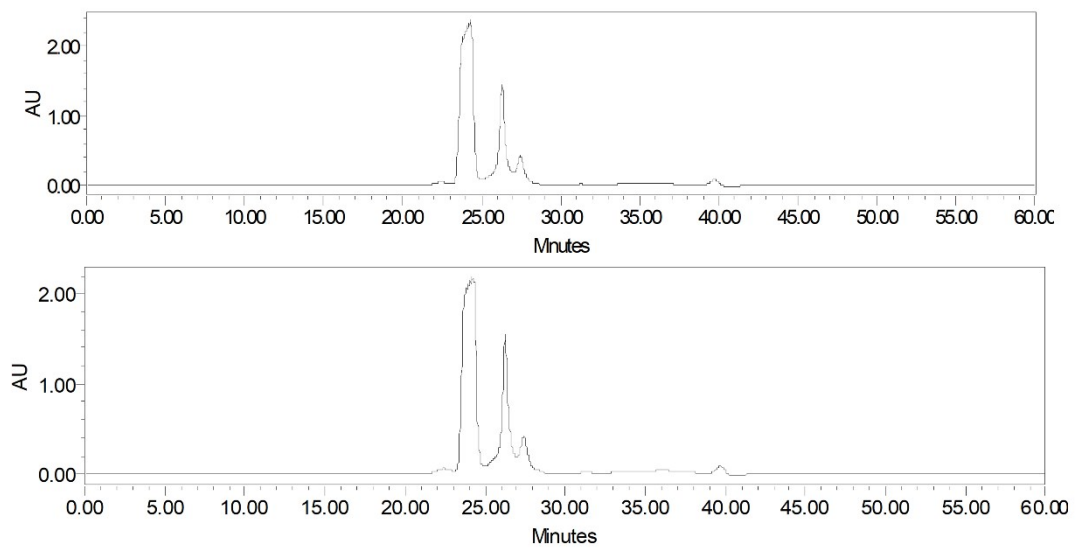

Fig. 12 HPLC-UV chromatograms of batch 12

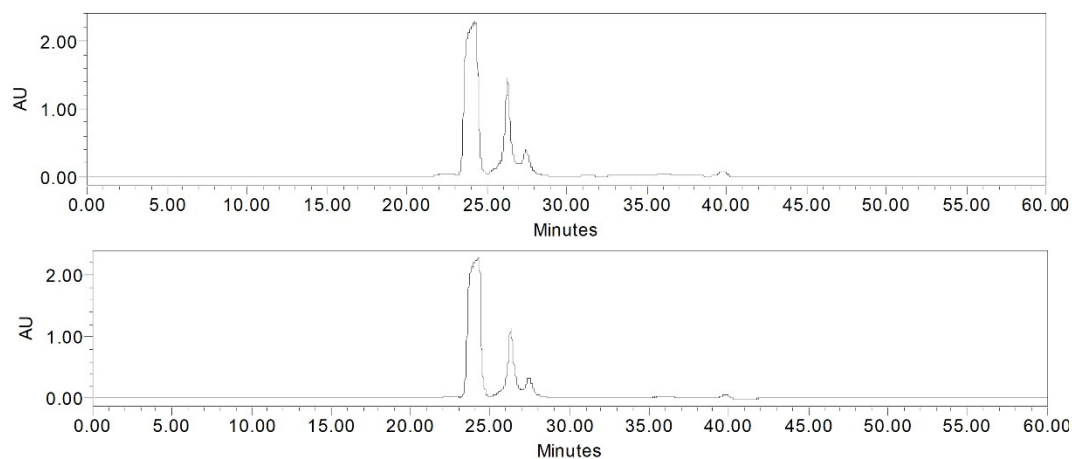

Fig. 13 HPLC-UV chromatograms of batch 13

## 6.2 Content data of total sugar in SL I

Total sugar content of 13 batches of injection were shown as followed. Each sample was measured in parallel 3 times.

Table 30 Total sugar content of 13 batches of injection

| Batch number | Content (%) |        |        | average | RSD % |
|--------------|-------------|--------|--------|---------|-------|
|              | 1           | 2      | 3      |         |       |
| 1            | 0.3171      | 0.3073 | 0.3163 | 0.3136  | 1.73  |
| 2            | 0.3000      | 0.2967 | 0.3020 | 0.2996  | 0.90  |
| 3            | 0.3008      | 0.3111 | 0.3102 | 0.3073  | 1.86  |
| 4            | 0.3076      | 0.3078 | 0.3079 | 0.3078  | 0.05  |
| 5            | 0.3021      | 0.3034 | 0.2995 | 0.3017  | 0.66  |
| 6            | 0.3112      | 0.3114 | 0.3218 | 0.3148  | 1.93  |
| 7            | 0.3136      | 0.3168 | 0.3131 | 0.3145  | 0.63  |
| 8            | 0.3009      | 0.3016 | 0.3083 | 0.3036  | 1.35  |
| 9            | 0.2947      | 0.2960 | 0.3002 | 0.2970  | 0.97  |
| 10           | 0.3075      | 0.3157 | 0.3047 | 0.3093  | 1.85  |
| 11           | 0.3060      | 0.2972 | 0.2976 | 0.3003  | 1.65  |
| 12           | 0.3136      | 0.3144 | 0.3159 | 0.3146  | 0.38  |
| 13           | 0.2928      | 0.3012 | 0.3009 | 0.2983  | 1.61  |

## 6.3 Content data of saccharides in SL I

Saccharides content of 13 batches of injection were shown as followed. Each sample was measured in parallel 3 times.

Table 31 Fru content of 13 batches of injection

| Batch<br>number | content (%) |        |        |         |
|-----------------|-------------|--------|--------|---------|
|                 | 1           | 2      | 3      | average |
| 1               | 0.1554      | 0.1535 | 0.1538 | 0.1543  |
| 2               | 0.1536      | 0.1516 | 0.1525 | 0.1526  |
| 3               | 0.1519      | 0.1503 | 0.1502 | 0.1508  |
| 4               | 0.1568      | 0.1554 | 0.1561 | 0.1561  |
| 5               | 0.1556      | 0.1554 | 0.1545 | 0.1551  |
| 6               | 0.1540      | 0.1529 | 0.1525 | 0.1531  |
| 7               | 0.1586      | 0.1589 | 0.1575 | 0.1583  |
| 8               | 0.1533      | 0.1554 | 0.1542 | 0.1543  |
| 9               | 0.1533      | 0.1540 | 0.1521 | 0.1531  |
| 10              | 0.1539      | 0.1538 | 0.1531 | 0.1536  |
| 11              | 0.1392      | 0.1379 | 0.1376 | 0.1382  |
| 12              | 0.1392      | 0.1398 | 0.1392 | 0.1394  |
| 13              | 0.1376      | 0.1366 | 0.1364 | 0.1369  |

Table 32 Glu content of 13 batches of injection

| Batch<br>number | content (%) |        |        |         |
|-----------------|-------------|--------|--------|---------|
|                 | 1           | 2      | 3      | average |
| 1               | 0.0552      | 0.0550 | 0.0565 | 0.0556  |
| 2               | 0.0555      | 0.0552 | 0.0561 | 0.0556  |
| 3               | 0.0554      | 0.0552 | 0.0545 | 0.0550  |
| 4               | 0.0573      | 0.0563 | 0.0574 | 0.0570  |
| 5               | 0.0570      | 0.0567 | 0.0569 | 0.0569  |
| 6               | 0.0549      | 0.0559 | 0.0559 | 0.0556  |
| 7               | 0.0570      | 0.0563 | 0.0577 | 0.0570  |
| 8               | 0.0554      | 0.0559 | 0.0563 | 0.0558  |

|    |        |        |        |        |
|----|--------|--------|--------|--------|
| 9  | 0.0555 | 0.0552 | 0.0546 | 0.0551 |
| 10 | 0.0530 | 0.0562 | 0.0542 | 0.0545 |
| 11 | 0.0562 | 0.0564 | 0.0577 | 0.0568 |
| 12 | 0.0572 | 0.0565 | 0.0577 | 0.0571 |
| 13 | 0.0575 | 0.0583 | 0.0577 | 0.0578 |

Table 33 Mel content of 13 batches of injection

| Batch<br>number | content (%) |        |        | average |
|-----------------|-------------|--------|--------|---------|
|                 | 1           | 2      | 3      |         |
| 1               | 0.0178      | 0.0176 | 0.0180 | 0.0178  |
| 2               | 0.0182      | 0.0180 | 0.0184 | 0.0182  |
| 3               | 0.0165      | 0.0157 | 0.0159 | 0.0160  |
| 4               | 0.0190      | 0.0189 | 0.0188 | 0.0189  |
| 5               | 0.0182      | 0.0179 | 0.0187 | 0.0183  |
| 6               | 0.0170      | 0.0160 | 0.0170 | 0.0167  |
| 7               | 0.0192      | 0.0189 | 0.0191 | 0.0190  |
| 8               | 0.0188      | 0.0184 | 0.0185 | 0.0185  |
| 9               | 0.0168      | 0.0166 | 0.0158 | 0.0164  |
| 10              | 0.0201      | 0.0204 | 0.0196 | 0.0200  |
| 11              | 0.0209      | 0.0205 | 0.0202 | 0.0205  |
| 12              | 0.0207      | 0.0201 | 0.0199 | 0.0202  |
| 13              | 0.0196      | 0.0194 | 0.0193 | 0.0194  |

Table 34 Man content of 13 batches of injection

| Batch<br>number | content (%) |        |        | average |
|-----------------|-------------|--------|--------|---------|
|                 | 1           | 2      | 3      |         |
| 1               | 0.0661      | 0.0705 | 0.0703 | 0.0690  |

|    |        |        |        |        |
|----|--------|--------|--------|--------|
| 2  | 0.0712 | 0.0709 | 0.0730 | 0.0717 |
| 3  | 0.0604 | 0.0616 | 0.0609 | 0.0610 |
| 4  | 0.0727 | 0.0701 | 0.0720 | 0.0716 |
| 5  | 0.0741 | 0.0747 | 0.0733 | 0.0740 |
| 6  | 0.0619 | 0.0621 | 0.0616 | 0.0619 |
| 7  | 0.0753 | 0.0741 | 0.0735 | 0.0743 |
| 8  | 0.0718 | 0.0726 | 0.0731 | 0.0725 |
| 9  | 0.0644 | 0.0637 | 0.0616 | 0.0632 |
| 10 | 0.0822 | 0.0801 | 0.0793 | 0.0805 |
| 11 | 0.0848 | 0.0840 | 0.0814 | 0.0834 |
| 12 | 0.0818 | 0.0800 | 0.0799 | 0.0806 |
| 13 | 0.0770 | 0.0769 | 0.0756 | 0.0765 |

## 6.4 Content data of phenolic acids in SL I

phenolic acids content of 13 batches of injection were shown as followed. Each sample was measured in parallel 3 times.

Table 35 DSS content of 13 batches of injection

| Batch number | content (%) |        |        |         |
|--------------|-------------|--------|--------|---------|
|              | 1           | 2      | 3      | average |
| 1            | 0.0434      | 0.0436 | 0.0435 | 0.0435  |
| 2            | 0.0428      | 0.0427 | 0.0428 | 0.0428  |
| 3            | 0.0432      | 0.0430 | 0.0430 | 0.0430  |
| 4            | 0.0433      | 0.0432 | 0.0430 | 0.0432  |
| 5            | 0.0433      | 0.0433 | 0.0433 | 0.0433  |
| 6            | 0.0434      | 0.0432 | 0.0432 | 0.0432  |
| 7            | 0.0449      | 0.0446 | 0.0447 | 0.0448  |
| 8            | 0.0440      | 0.0440 | 0.0439 | 0.0440  |
| 9            | 0.0435      | 0.0437 | 0.0437 | 0.0436  |
| 10           | 0.0436      | 0.0436 | 0.0436 | 0.0436  |
| 11           | 0.0438      | 0.0439 | 0.0437 | 0.0438  |
| 12           | 0.0443      | 0.0441 | 0.0440 | 0.0441  |
| 13           | 0.0437      | 0.0435 | 0.0436 | 0.0436  |



Table 36 PA content of 13 batches of injection

| Batch<br>number | content (%) |        |        | average |
|-----------------|-------------|--------|--------|---------|
|                 | 1           | 2      | 3      |         |
| 1               | 0.0024      | 0.0023 | 0.0024 | 0.0024  |
| 2               | 0.0024      | 0.0023 | 0.0023 | 0.0023  |
| 3               | 0.0024      | 0.0024 | 0.0024 | 0.0024  |
| 4               | 0.0023      | 0.0024 | 0.0024 | 0.0024  |
| 5               | 0.0024      | 0.0024 | 0.0024 | 0.0024  |
| 6               | 0.0025      | 0.0024 | 0.0024 | 0.0024  |
| 7               | 0.0025      | 0.0025 | 0.0025 | 0.0025  |
| 8               | 0.0024      | 0.0025 | 0.0025 | 0.0025  |
| 9               | 0.0024      | 0.0024 | 0.0024 | 0.0024  |
| 10              | 0.0023      | 0.0023 | 0.0023 | 0.0023  |
| 11              | 0.0019      | 0.0019 | 0.0019 | 0.0019  |
| 12              | 0.0019      | 0.0019 | 0.0019 | 0.0019  |
| 13              | 0.0018      | 0.0019 | 0.0018 | 0.0018  |

Table 37 RA content of 13 batches of injection

| Batch<br>number | content (%) |        |        | average |
|-----------------|-------------|--------|--------|---------|
|                 | 1           | 2      | 3      |         |
| 1               | 0.0022      | 0.0022 | 0.0022 | 0.0022  |
| 2               | 0.0022      | 0.0022 | 0.0022 | 0.0022  |
| 3               | 0.0022      | 0.0022 | 0.0022 | 0.0022  |
| 4               | 0.0022      | 0.0022 | 0.0022 | 0.0022  |
| 5               | 0.0022      | 0.0022 | 0.0022 | 0.0022  |
| 6               | 0.0022      | 0.0022 | 0.0022 | 0.0022  |
| 7               | 0.0023      | 0.0023 | 0.0023 | 0.0023  |
| 8               | 0.0023      | 0.0023 | 0.0023 | 0.0023  |
| 9               | 0.0022      | 0.0022 | 0.0022 | 0.0022  |
| 10              | 0.0022      | 0.0022 | 0.0022 | 0.0022  |
| 11              | 0.0016      | 0.0016 | 0.0016 | 0.0016  |
| 12              | 0.0016      | 0.0016 | 0.0016 | 0.0016  |
| 13              | 0.0016      | 0.0016 | 0.0016 | 0.0016  |

Table 38 SAB content of 13 batches of injection

| Batch<br>number | content (%) |        |        | average |
|-----------------|-------------|--------|--------|---------|
|                 | 1           | 2      | 3      |         |
| 1               | 0.0050      | 0.0052 | 0.0052 | 0.0051  |
| 2               | 0.0049      | 0.0048 | 0.0050 | 0.0049  |
| 3               | 0.0050      | 0.0048 | 0.0050 | 0.0049  |
| 4               | 0.0049      | 0.0049 | 0.0049 | 0.0049  |

|    |        |        |        |        |
|----|--------|--------|--------|--------|
| 5  | 0.0052 | 0.0052 | 0.0052 | 0.0052 |
| 6  | 0.0050 | 0.0050 | 0.0051 | 0.0050 |
| 7  | 0.0054 | 0.0053 | 0.0054 | 0.0053 |
| 8  | 0.0051 | 0.0052 | 0.0051 | 0.0051 |
| 9  | 0.0049 | 0.0052 | 0.0052 | 0.0051 |
| 10 | 0.0052 | 0.0051 | 0.0053 | 0.0052 |
| 11 | 0.0056 | 0.0056 | 0.0056 | 0.0056 |
| 12 | 0.0057 | 0.0057 | 0.0057 | 0.0057 |
| 13 | 0.0055 | 0.0055 | 0.0055 | 0.0055 |

Table 39 SAA content of 13 batches of injection

| Batch number | content (%) |        |        |         |
|--------------|-------------|--------|--------|---------|
|              | 1           | 2      | 3      | average |
| 1            | 0.0066      | 0.0066 | 0.0066 | 0.0066  |
| 2            | 0.0065      | 0.0064 | 0.0065 | 0.0064  |
| 3            | 0.0063      | 0.0062 | 0.0063 | 0.0062  |
| 4            | 0.0062      | 0.0062 | 0.0061 | 0.0062  |
| 5            | 0.0066      | 0.0066 | 0.0066 | 0.0066  |
| 6            | 0.0064      | 0.0062 | 0.0063 | 0.0063  |
| 7            | 0.0068      | 0.0068 | 0.0068 | 0.0068  |
| 8            | 0.0065      | 0.0066 | 0.0067 | 0.0066  |
| 9            | 0.0066      | 0.0066 | 0.0066 | 0.0066  |
| 10           | 0.0067      | 0.0067 | 0.0067 | 0.0067  |
| 11           | 0.0040      | 0.0041 | 0.0040 | 0.0040  |
| 12           | 0.0041      | 0.0041 | 0.0041 | 0.0041  |
| 13           | 0.0038      | 0.0038 | 0.0038 | 0.0038  |

## 6.5 Similarity evaluation of 13 batches of SL I

Table 40 The similarity evaluation result of the 13 batch SL I (including the Ligustrazine Hydrochloride)

| Batch numbers | Similarity | Batch numbers | Similarity |
|---------------|------------|---------------|------------|
| 1             | 1          | 8             | 1          |
| 2             | 1          | 9             | 1          |
| 3             | 1          | 10            | 1          |
| 4             | 1          | 11            | 1          |
| 5             | 1          | 12            | 1          |
| 6             | 1          | 13            | 1          |
| 7             | 1          |               |            |

Similarity: comparing the injection chromatogram with the control fingerprint.

Table 41 The similarity evaluation result of the 13 batch SL I (without the Ligustrazine Hydrochloride)

| Batch numbers | Similarity | Batch numbers | Similarity |
|---------------|------------|---------------|------------|
| 1             | 0.999      | 8             | 0.999      |
| 2             | 0.999      | 9             | 0.999      |
| 3             | 0.999      | 10            | 0.999      |
| 4             | 0.999      | 11            | 0.988      |
| 5             | 0.998      | 12            | 0.988      |
| 6             | 0.999      | 13            | 0.985      |
| 7             | 0.999      |               |            |

Similarity: comparing the injection chromatogram with the control fingerprint.

## 6.6 Content data of inorganic salt ions in SL I

Table 42 Anion content of 13 batches SL I

| Batch number | Cl <sup>-</sup><br>(mg/L) | NO <sub>3</sub> <sup>-</sup><br>(mg/L) | SO <sub>4</sub> <sup>2-</sup><br>(mg/L) |
|--------------|---------------------------|----------------------------------------|-----------------------------------------|
| 1            | 3.2779                    | 0.0721                                 | 0.1171                                  |
| 2            | 3.1748                    | 0.0694                                 | 0.1225                                  |
| 3            | 3.2534                    | 0.072                                  | 0.1492                                  |
| 4            | 3.2827                    | 0.0707                                 | 0.1187                                  |
| 5            | 3.2052                    | 0.0706                                 | 0.1265                                  |
| 6            | 3.2927                    | 0.0717                                 | 0.1341                                  |
| 7            | 3.1201                    | 0.0747                                 | 0.1167                                  |
| 8            | 3.2347                    | 0.0768                                 | 0.1052                                  |
| 9            | 3.2533                    | 0.0728                                 | 0.1242                                  |
| 10           | 3.2353                    | 0.0716                                 | 0.123                                   |
| 11           | 3.2878                    | 0.0679                                 | 0.1025                                  |
| 12           | 3.2311                    | 0.0687                                 | 0.0945                                  |
| 13           | 3.3242                    | 0.0683                                 | 0.1013                                  |

Table 43 Cation content of 13 batches SL I

| Batch number | Na <sup>+</sup><br>(mg/L) | K <sup>+</sup><br>(mg/L) | Ca <sup>2+</sup><br>(mg/L) | Mg <sup>2+</sup><br>(mg/L) | Fe <sup>+</sup><br>(mg/L) |
|--------------|---------------------------|--------------------------|----------------------------|----------------------------|---------------------------|
| 1            | 318.7                     | 162.6                    | 7.380                      | 41.79                      | 0.109                     |
| 2            | 275.3                     | 119.0                    | 7.350                      | 41.75                      | 0.103                     |
| 3            | 277.3                     | 129.9                    | 6.920                      | 41.76                      | 0.152                     |
| 4            | 387.9                     | 157.2                    | 8.460                      | 58.80                      | 0.106                     |
| 5            | 273.7                     | 116.5                    | 7.050                      | 41.78                      | 0.118                     |

|    |       |       |       |       |       |
|----|-------|-------|-------|-------|-------|
| 6  | 267.1 | 98.60 | 7.040 | 42.50 | 0.075 |
| 7  | 261.5 | 133.7 | 7.380 | 42.59 | 0.105 |
| 8  | 266.6 | 127.8 | 6.980 | 42.21 | 0.099 |
| 9  | 266.7 | 127.0 | 7.020 | 41.84 | 0.106 |
| 10 | 292.9 | 143.7 | 6.870 | 42.21 | 0.079 |
| 11 | 277.9 | 124.8 | 7.490 | 43.00 | 0.097 |
| 12 | 267.1 | 118.9 | 7.270 | 40.96 | 0.066 |
| 13 | 299.4 | 140.9 | 7.850 | 45.24 | 0.067 |

---
